# Supplementary material for: Evaluation of Wearable Digital Devices in a Phase I Clinical Trial
Source: PubMed Central journal article supplement — Clin Transl Sci. 2019 Jan 11;12(3):247–56. doi: 10.1111/cts.12602 (PMC6510458; doi:10.1111/cts.12602), 2019-01-11

Figure S2. Completeness of data collection for the HealthPatch (A) and Actiwatch (B) devices. The black color represents periods when the valid data were collected, the red color represents periods of invalid data. The daytime depicted in yellow was defined as between 8 AM and 9 PM. The nighttime period was defined as between 12 AM and 6 AM and is shown in magenta.

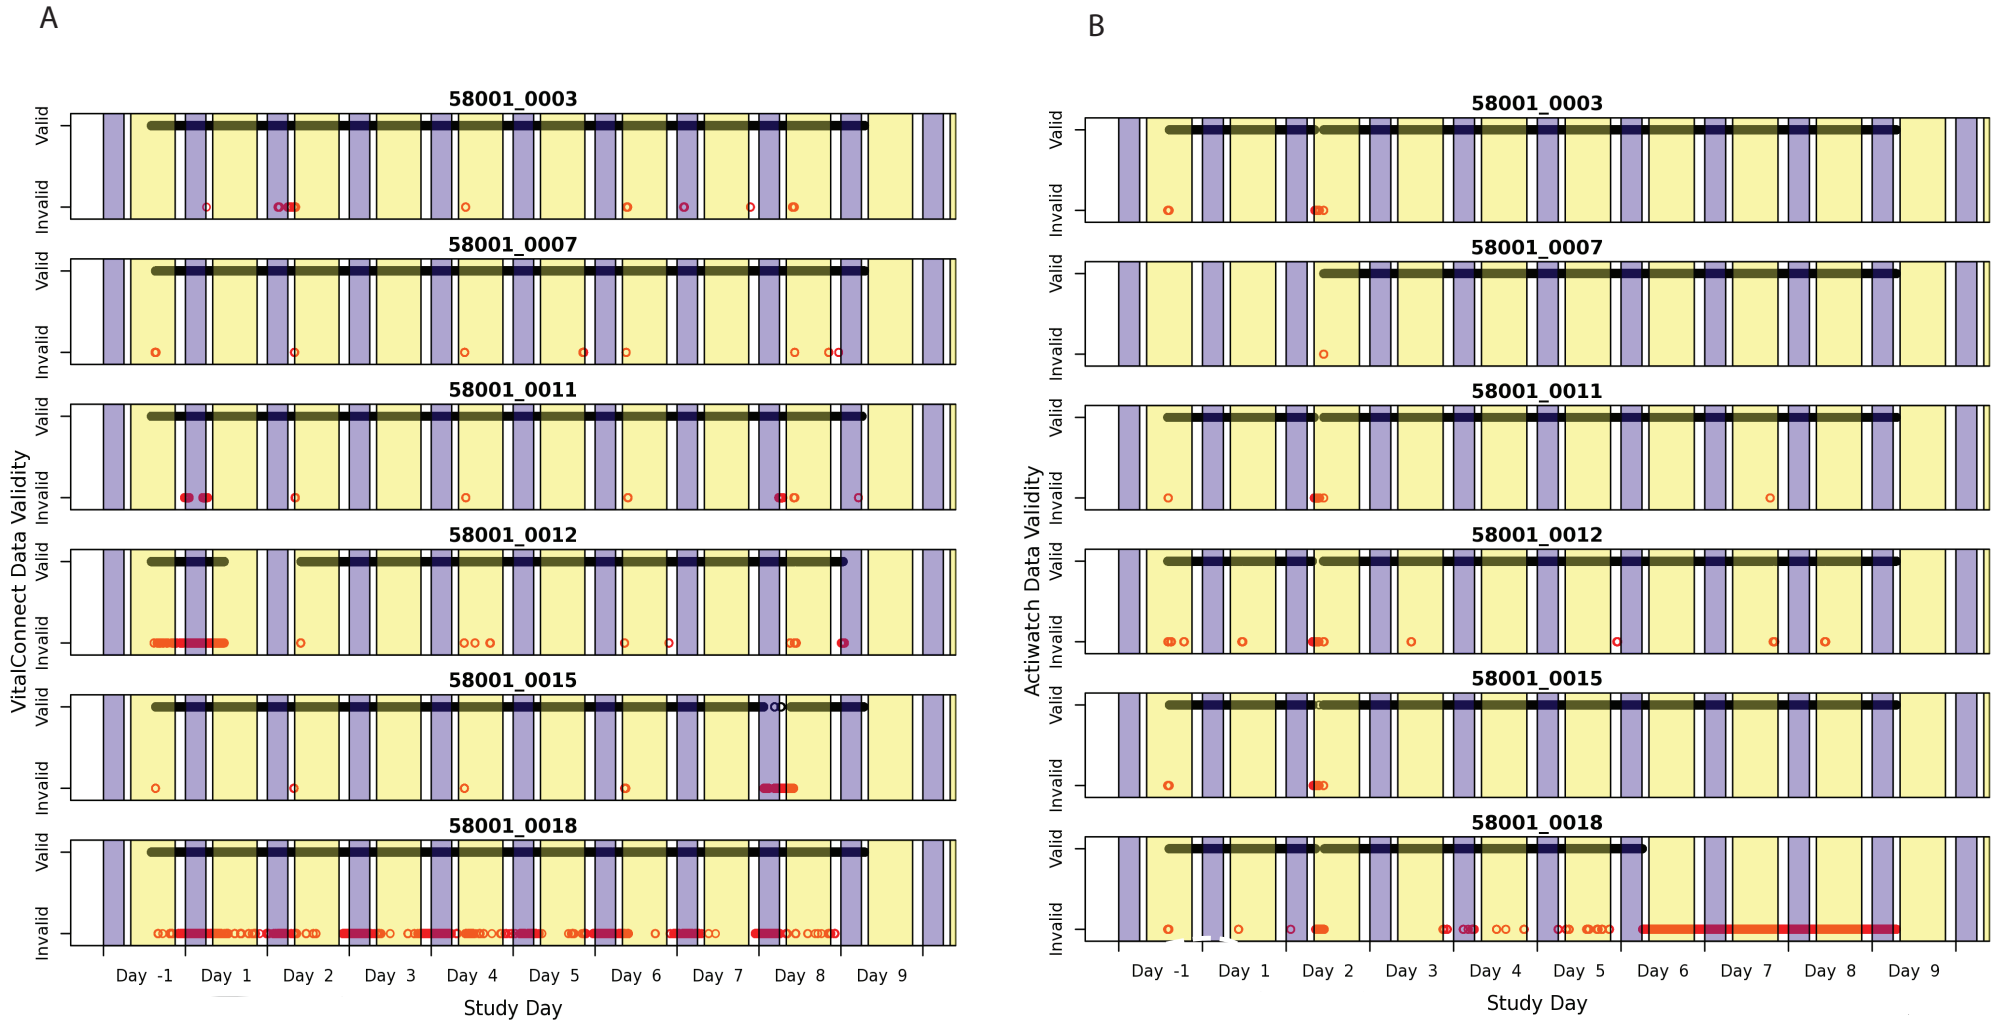

Supplement: CTS-12-247-s002.pdf [file CTS-12-247-s002.pdf]
