# Supplementary material for: Evaluation of Wearable Digital Devices in a Phase I Clinical Trial
Source: PubMed Central journal article supplement — Clin Transl Sci. 2019 Jan 11;12(3):247–56. doi: 10.1111/cts.12602 (PMC6510458; doi:10.1111/cts.12602), 2019-01-11

Figure S3. The comparison of health measurements by the HealthPatch (step counts, X-axis) and Actiwatch (activity counts, Y-axis) devices for study subjects 58001\_0003 (A), 58001\_0007(B), 58001\_0011 (C), 58001\_0012 (D), 58001\_0015 (E) and 58001\_0018(F).

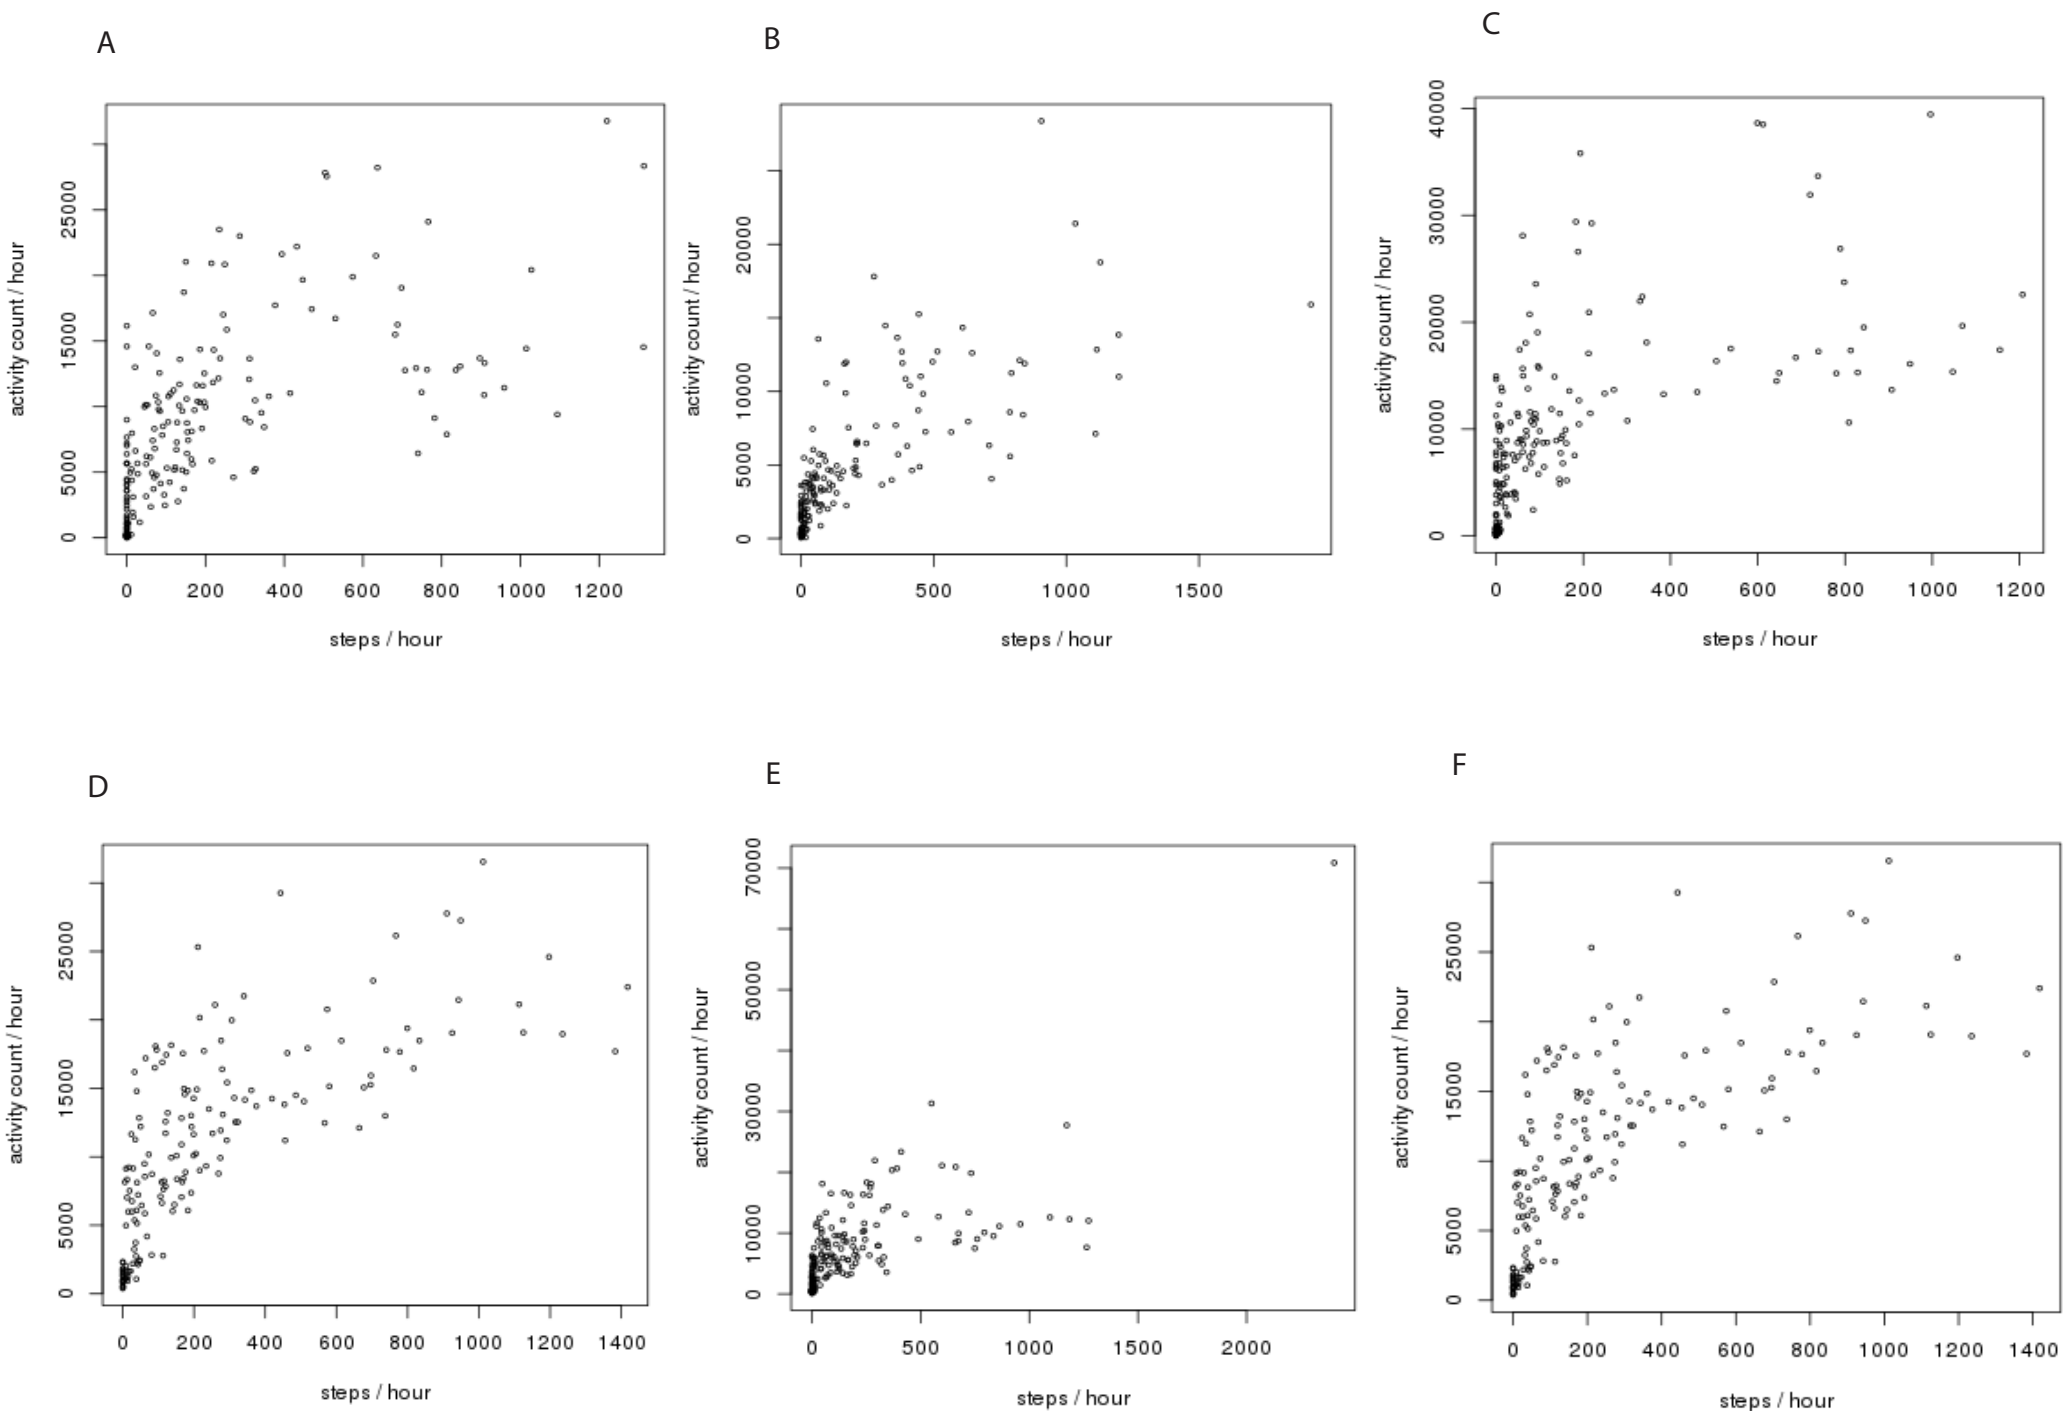

Supplement: CTS-12-247-s003.pdf [file CTS-12-247-s003.pdf]
