# Supplementary material for: Evaluation of Wearable Digital Devices in a Phase I Clinical Trial
Source: PubMed Central journal article supplement — Clin Transl Sci. 2019 Jan 11;12(3):247–56. doi: 10.1111/cts.12602 (PMC6510458; doi:10.1111/cts.12602), 2019-01-11
Supplement: CTS-12-247-s004.pdf [file CTS-12-247-s004.pdf]

**Table S1.** Completeness of data collection for the HealthPatch and Actiwatch devices for each study subject.

| Subject ID  | Compliance rates |              |
|-------------|------------------|--------------|
|             | HealthPatch      | Actiwatch    |
| 58001_0003  | 99.2%            | 98.6%        |
| 58001_0007  | 98.6%            | 78.6%        |
| 58001_0011  | 98.1%            | 98.2%        |
| 58001_0012  | 83.6%            | 97.2%        |
| 58001_0015  | 95.2%            | 98.3%        |
| 58001_0018  | 83.8%            | 62.6%        |
| Mean +/- SD | 93.1+/-7.4%      | 88.9+/-15.1% |
