# Supplementary material for: Evaluation of Wearable Digital Devices in a Phase I Clinical Trial
Source: PubMed Central journal article supplement — Clin Transl Sci. 2019 Jan 11;12(3):247–56. doi: 10.1111/cts.12602 (PMC6510458; doi:10.1111/cts.12602), 2019-01-11
Supplement: CTS-12-247-s005.pdf [file CTS-12-247-s005.pdf]

Table S2. Correlation of activity measurements by the HealthPatch and Actiwatch devices.

| Subject ID | Pearson correlation (R) |
|------------|-------------------------|
| 58001_0003 | 0.65                    |
| 58001_0007 | 0.74                    |
| 58001_0011 | 0.64                    |
| 58001_0012 | 0.72                    |
| 58001_0015 | 0.71                    |
| 58001_0018 | 0.57                    |
