# Supplementary material for: Evaluation of Wearable Digital Devices in a Phase I Clinical Trial
Source: PubMed Central journal article supplement — Clin Transl Sci. 2019 Jan 11;12(3):247–56. doi: 10.1111/cts.12602 (PMC6510458; doi:10.1111/cts.12602), 2019-01-11
Supplement: CTS-12-247-s006.pdf [file CTS-12-247-s006.pdf]

Table S3. Quantification of time intervals with missing data.

|            | Gap count | Total gap time<br>(hours) |
|------------|-----------|---------------------------|
| 58001_0003 | 27        | 0.6                       |
| 58001_0007 | 58        | 1.5                       |
| 58001_0011 | 16        | 1.5                       |
| 58001_0012 | 417       | 28.3                      |
| 58001_0015 | 11        | 8.3                       |
| 58001_0018 | 1345      | 35.4                      |
